# Supplementary material
Source: PubMed Central journal article supplement (PMC6481317)
Supplement: NIHMS1524093-supplement-Acknowledgment_forms.pdf [file NIHMS1524093-supplement-Acknowledgment_forms.pdf]

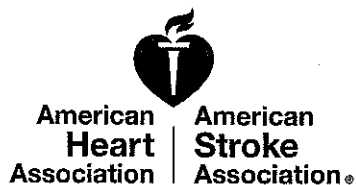

## Acknowledgment Permission Form

---

Journal STROKE

Manuscript Number \_\_\_\_\_

First Author Babyar, Suzanne

Title of Work Research Article: Lesion Localization of Post-Stroke Lateropulsion

Authors must provide written permission/approval from all individuals mentioned by name in the Acknowledgments section of a submitted manuscript. By signing this form, any and all acknowledged persons therefore state that they have read and approved the mention of their names in the Acknowledgment section of the aforementioned paper.

|           |                       |           |                                                                                    |      |                |
|-----------|-----------------------|-----------|------------------------------------------------------------------------------------|------|----------------|
| Name (1)  | <u>Hana Mahallati</u> | Signature | 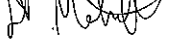 | Date | <u>8/18/18</u> |
| Name (2)  | _____                 | Signature | _____                                                                              | Date | _____          |
| Name (3)  | _____                 | Signature | _____                                                                              | Date | _____          |
| Name (4)  | _____                 | Signature | _____                                                                              | Date | _____          |
| Name (5)  | _____                 | Signature | _____                                                                              | Date | _____          |
| Name (6)  | _____                 | Signature | _____                                                                              | Date | _____          |
| Name (7)  | _____                 | Signature | _____                                                                              | Date | _____          |
| Name (8)  | _____                 | Signature | _____                                                                              | Date | _____          |
| Name (9)  | _____                 | Signature | _____                                                                              | Date | _____          |
| Name (10) | _____                 | Signature | _____                                                                              | Date | _____          |
| Name (11) | _____                 | Signature | _____                                                                              | Date | _____          |
| Name (12) | _____                 | Signature | _____                                                                              | Date | _____          |
| Name (13) | _____                 | Signature | _____                                                                              | Date | _____          |
| Name (14) | _____                 | Signature | _____                                                                              | Date | _____          |
| Name (15) | _____                 | Signature | _____                                                                              | Date | _____          |
| Name (16) | _____                 | Signature | _____                                                                              | Date | _____          |
| Name (17) | _____                 | Signature | _____                                                                              | Date | _____          |
| Name (18) | _____                 | Signature | _____                                                                              | Date | _____          |
| Name (19) | _____                 | Signature | _____                                                                              | Date | _____          |
| Name (20) | _____                 | Signature | _____                                                                              | Date | _____          |

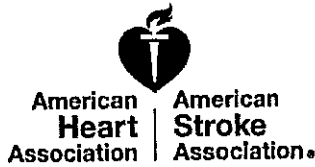

## Acknowledgment Permission Form

Journal STROKE

Manuscript Number \_\_\_\_\_

First Author Babyar, Suzanne

Title of Work Research Article: Lesion Localization of Post-Stroke Lateropulsion

Authors must provide written permission/approval from all individuals mentioned by name in the Acknowledgments section of a submitted manuscript. By signing this form, any and all acknowledged persons therefore state that they have read and approved the mention of their names in the Acknowledgment section of the aforementioned paper.

|                               |                                       |                  |
|-------------------------------|---------------------------------------|------------------|
| Name (1) <u>Divija Chopra</u> | Signature <u><i>Divija Chopra</i></u> | Date <u>8/21</u> |
| Name (2) _____                | Signature _____                       | Date _____       |
| Name (3) _____                | Signature _____                       | Date _____       |
| Name (4) _____                | Signature _____                       | Date _____       |
| Name (5) _____                | Signature _____                       | Date _____       |
| Name (6) _____                | Signature _____                       | Date _____       |
| Name (7) _____                | Signature _____                       | Date _____       |
| Name (8) _____                | Signature _____                       | Date _____       |
| Name (9) _____                | Signature _____                       | Date _____       |
| Name (10) _____               | Signature _____                       | Date _____       |
| Name (11) _____               | Signature _____                       | Date _____       |
| Name (12) _____               | Signature _____                       | Date _____       |
| Name (13) _____               | Signature _____                       | Date _____       |
| Name (14) _____               | Signature _____                       | Date _____       |
| Name (15) _____               | Signature _____                       | Date _____       |
| Name (16) _____               | Signature _____                       | Date _____       |
| Name (17) _____               | Signature _____                       | Date _____       |
| Name (18) _____               | Signature _____                       | Date _____       |
| Name (19) _____               | Signature _____                       | Date _____       |
| Name (20) _____               | Signature _____                       | Date _____       |

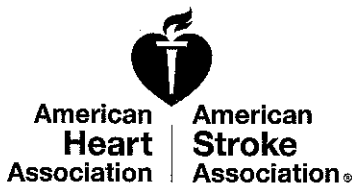

## Acknowledgment Permission Form

---

**Journal** STROKE

**Manuscript Number** \_\_\_\_\_

**First Author** Babyar, Suzanne

**Title of Work** Research Article: Lesion Localization of Post-Stroke Lateropulsion

Authors must provide written permission/approval from all individuals mentioned by name in the Acknowledgments section of a submitted manuscript. By signing this form, any and all acknowledged persons therefore state that they have read and approved the mention of their names in the Acknowledgment section of the aforementioned paper.

|           |                              |                                                                                             |                       |
|-----------|------------------------------|---------------------------------------------------------------------------------------------|-----------------------|
| Name (1)  | <u>Maria Lopez Cavestany</u> | Signature 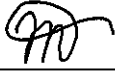 | Date <u>8/20/2018</u> |
| Name (2)  | _____                        | Signature _____                                                                             | Date _____            |
| Name (3)  | _____                        | Signature _____                                                                             | Date _____            |
| Name (4)  | _____                        | Signature _____                                                                             | Date _____            |
| Name (5)  | _____                        | Signature _____                                                                             | Date _____            |
| Name (6)  | _____                        | Signature _____                                                                             | Date _____            |
| Name (7)  | _____                        | Signature _____                                                                             | Date _____            |
| Name (8)  | _____                        | Signature _____                                                                             | Date _____            |
| Name (9)  | _____                        | Signature _____                                                                             | Date _____            |
| Name (10) | _____                        | Signature _____                                                                             | Date _____            |
| Name (11) | _____                        | Signature _____                                                                             | Date _____            |
| Name (12) | _____                        | Signature _____                                                                             | Date _____            |
| Name (13) | _____                        | Signature _____                                                                             | Date _____            |
| Name (14) | _____                        | Signature _____                                                                             | Date _____            |
| Name (15) | _____                        | Signature _____                                                                             | Date _____            |
| Name (16) | _____                        | Signature _____                                                                             | Date _____            |
| Name (17) | _____                        | Signature _____                                                                             | Date _____            |
| Name (18) | _____                        | Signature _____                                                                             | Date _____            |
| Name (19) | _____                        | Signature _____                                                                             | Date _____            |
| Name (20) | _____                        | Signature _____                                                                             | Date _____            |

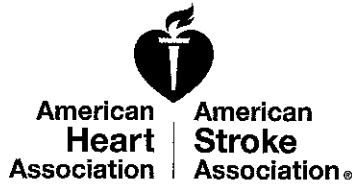

## Acknowledgment Permission Form

---

**Journal** STROKE

**Manuscript Number** \_\_\_\_\_

**First Author** Babyar, Suzanne

**Title of Work** Research Article: Lesion Localization of Post-Stroke Lateropulsion

Authors must provide written permission/approval from all individuals mentioned by name in the Acknowledgments section of a submitted manuscript. By signing this form, any and all acknowledged persons therefore state that they have read and approved the mention of their names in the Acknowledgment section of the aforementioned paper.

|           |                   |           |                   |                                                                                     |      |                 |
|-----------|-------------------|-----------|-------------------|-------------------------------------------------------------------------------------|------|-----------------|
| Name (1)  | <u>Sam Snyder</u> | Signature | <u>Sam Snyder</u> | <small>Digitally signed by Sam Snyder<br/>Date: 2018.08.19 13:38:13 -05'00'</small> | Date | <u>08/19/18</u> |
| Name (2)  | _____             | Signature | _____             |                                                                                     | Date | _____           |
| Name (3)  | _____             | Signature | _____             |                                                                                     | Date | _____           |
| Name (4)  | _____             | Signature | _____             |                                                                                     | Date | _____           |
| Name (5)  | _____             | Signature | _____             |                                                                                     | Date | _____           |
| Name (6)  | _____             | Signature | _____             |                                                                                     | Date | _____           |
| Name (7)  | _____             | Signature | _____             |                                                                                     | Date | _____           |
| Name (8)  | _____             | Signature | _____             |                                                                                     | Date | _____           |
| Name (9)  | _____             | Signature | _____             |                                                                                     | Date | _____           |
| Name (10) | _____             | Signature | _____             |                                                                                     | Date | _____           |
| Name (11) | _____             | Signature | _____             |                                                                                     | Date | _____           |
| Name (12) | _____             | Signature | _____             |                                                                                     | Date | _____           |
| Name (13) | _____             | Signature | _____             |                                                                                     | Date | _____           |
| Name (14) | _____             | Signature | _____             |                                                                                     | Date | _____           |
| Name (15) | _____             | Signature | _____             |                                                                                     | Date | _____           |
| Name (16) | _____             | Signature | _____             |                                                                                     | Date | _____           |
| Name (17) | _____             | Signature | _____             |                                                                                     | Date | _____           |
| Name (18) | _____             | Signature | _____             |                                                                                     | Date | _____           |
| Name (19) | _____             | Signature | _____             |                                                                                     | Date | _____           |
| Name (20) | _____             | Signature | _____             |                                                                                     | Date | _____           |

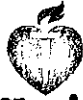

American Heart Association | American Stroke Association

## Acknowledgment Permission Form

Journal STROKE

Manuscript Number \_\_\_\_\_

First Author Babyar, Suzanne

Title of Work Research Article: Lesion Localization of Post-Stroke Lateropulsion

Authors must provide written permission/approval from all individuals mentioned by name in the Acknowledgments section of a submitted manuscript. By signing this form, any and all acknowledged persons therefore state that they have read and approved the mention of their names in the Acknowledgment section of the aforementioned paper.

|           |                      |           |                                                                                           |      |                  |
|-----------|----------------------|-----------|-------------------------------------------------------------------------------------------|------|------------------|
| Name (1)  | <u>Noelle Santos</u> | Signature | <u>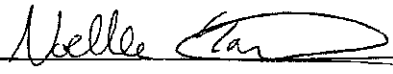</u> | Date | <u>8/19/2018</u> |
| Name (2)  | _____                | Signature | _____                                                                                     | Date | _____            |
| Name (3)  | _____                | Signature | _____                                                                                     | Date | _____            |
| Name (4)  | _____                | Signature | _____                                                                                     | Date | _____            |
| Name (5)  | _____                | Signature | _____                                                                                     | Date | _____            |
| Name (6)  | _____                | Signature | _____                                                                                     | Date | _____            |
| Name (7)  | _____                | Signature | _____                                                                                     | Date | _____            |
| Name (8)  | _____                | Signature | _____                                                                                     | Date | _____            |
| Name (9)  | _____                | Signature | _____                                                                                     | Date | _____            |
| Name (10) | _____                | Signature | _____                                                                                     | Date | _____            |
| Name (11) | _____                | Signature | _____                                                                                     | Date | _____            |
| Name (12) | _____                | Signature | _____                                                                                     | Date | _____            |
| Name (13) | _____                | Signature | _____                                                                                     | Date | _____            |
| Name (14) | _____                | Signature | _____                                                                                     | Date | _____            |
| Name (15) | _____                | Signature | _____                                                                                     | Date | _____            |
| Name (16) | _____                | Signature | _____                                                                                     | Date | _____            |
| Name (17) | _____                | Signature | _____                                                                                     | Date | _____            |
| Name (18) | _____                | Signature | _____                                                                                     | Date | _____            |
| Name (19) | _____                | Signature | _____                                                                                     | Date | _____            |
| Name (20) | _____                | Signature | _____                                                                                     | Date | _____            |

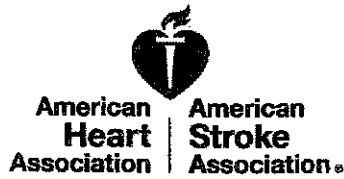

## Acknowledgment Permission Form

---

**Journal** STROKE

**Manuscript Number** \_\_\_\_\_

**First Author** Babyar, Suzanne

**Title of Work** Research Article: Lesion Localization of Post-Stroke Lateropulsion

Authors must provide written permission/approval from all individuals mentioned by name in the Acknowledgments section of a submitted manuscript. By signing this form, any and all acknowledged persons therefore state that they have read and approved the mention of their names in the Acknowledgment section of the aforementioned paper.

|           |                  |           |                                |      |                |
|-----------|------------------|-----------|--------------------------------|------|----------------|
| Name (1)  | <u>Joel Buss</u> | Signature | <u>[Handwritten Signature]</u> | Date | <u>8/20/18</u> |
| Name (2)  | _____            | Signature | _____                          | Date | _____          |
| Name (3)  | _____            | Signature | _____                          | Date | _____          |
| Name (4)  | _____            | Signature | _____                          | Date | _____          |
| Name (5)  | _____            | Signature | _____                          | Date | _____          |
| Name (6)  | _____            | Signature | _____                          | Date | _____          |
| Name (7)  | _____            | Signature | _____                          | Date | _____          |
| Name (8)  | _____            | Signature | _____                          | Date | _____          |
| Name (9)  | _____            | Signature | _____                          | Date | _____          |
| Name (10) | _____            | Signature | _____                          | Date | _____          |
| Name (11) | _____            | Signature | _____                          | Date | _____          |
| Name (12) | _____            | Signature | _____                          | Date | _____          |
| Name (13) | _____            | Signature | _____                          | Date | _____          |
| Name (14) | _____            | Signature | _____                          | Date | _____          |
| Name (15) | _____            | Signature | _____                          | Date | _____          |
| Name (16) | _____            | Signature | _____                          | Date | _____          |
| Name (17) | _____            | Signature | _____                          | Date | _____          |
| Name (18) | _____            | Signature | _____                          | Date | _____          |
| Name (19) | _____            | Signature | _____                          | Date | _____          |
| Name (20) | _____            | Signature | _____                          | Date | _____          |

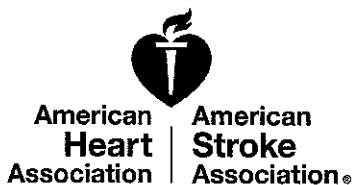

## Acknowledgment Permission Form

---

**Journal** STROKE

**Manuscript Number** \_\_\_\_\_

**First Author** Babyar, Suzanne

**Title of Work** Research Article: Lesion Localization of Post-Stroke Lateropulsion

Authors must provide written permission/approval from all individuals mentioned by name in the Acknowledgments section of a submitted manuscript. By signing this form, any and all acknowledged persons therefore state that they have read and approved the mention of their names in the Acknowledgment section of the aforementioned paper.

|           |                    |           |                    |                                                                                      |      |                 |
|-----------|--------------------|-----------|--------------------|--------------------------------------------------------------------------------------|------|-----------------|
| Name (1)  | <u>Mark Bowren</u> | Signature | <u>Mark Bowren</u> | <small>Digitally signed by Mark Bowren<br/>Date: 2018.08.20 15:41:22 -05'00'</small> | Date | <u>08-20-18</u> |
| Name (2)  | _____              | Signature | _____              |                                                                                      | Date | _____           |
| Name (3)  | _____              | Signature | _____              |                                                                                      | Date | _____           |
| Name (4)  | _____              | Signature | _____              |                                                                                      | Date | _____           |
| Name (5)  | _____              | Signature | _____              |                                                                                      | Date | _____           |
| Name (6)  | _____              | Signature | _____              |                                                                                      | Date | _____           |
| Name (7)  | _____              | Signature | _____              |                                                                                      | Date | _____           |
| Name (8)  | _____              | Signature | _____              |                                                                                      | Date | _____           |
| Name (9)  | _____              | Signature | _____              |                                                                                      | Date | _____           |
| Name (10) | _____              | Signature | _____              |                                                                                      | Date | _____           |
| Name (11) | _____              | Signature | _____              |                                                                                      | Date | _____           |
| Name (12) | _____              | Signature | _____              |                                                                                      | Date | _____           |
| Name (13) | _____              | Signature | _____              |                                                                                      | Date | _____           |
| Name (14) | _____              | Signature | _____              |                                                                                      | Date | _____           |
| Name (15) | _____              | Signature | _____              |                                                                                      | Date | _____           |
| Name (16) | _____              | Signature | _____              |                                                                                      | Date | _____           |
| Name (17) | _____              | Signature | _____              |                                                                                      | Date | _____           |
| Name (18) | _____              | Signature | _____              |                                                                                      | Date | _____           |
| Name (19) | _____              | Signature | _____              |                                                                                      | Date | _____           |
| Name (20) | _____              | Signature | _____              |                                                                                      | Date | _____           |
