# Supplementary material
Source: PubMed Central journal article supplement (PMC6481317)
Supplement: NIHMS1524093-supplement-Supplemental_Material.pdf [file NIHMS1524093-supplement-Supplemental_Material.pdf]

## **SUPPLEMENTAL MATERIAL**

### **Lesion Localization of Post-Stroke Lateropulsion**

Suzanne R. Babyar, PT, PhD,<sup>1,5</sup> Anna Smeragliuolo, BS,<sup>2</sup> Fatimah M. Albazron, MS,<sup>3</sup> David Putrino, PhD,<sup>2,4</sup> Michael Reding, MD,<sup>5</sup> Aaron D. Boes, MD, PhD<sup>3</sup>

<sup>1</sup> Department of Physical Therapy, Hunter College, The City University of New York, 425 East 25<sup>th</sup> Street, New York, New York, USA, 10010

<sup>2</sup> Department of Telemedicine and Virtual Rehabilitation, Burke Medical Research Institute, 785 Mamaroneck Ave, White Plains, New York, USA, 10605

<sup>3</sup> Iowa Neuroimaging and Noninvasive Brain Stimulation Laboratory, Departments of Pediatrics, Neurology & Psychiatry, University of Iowa Hospitals and Clinics, 200 Hawkins Drive, Iowa City, USA, 52242

<sup>4</sup> Department of Rehabilitation and Human Performance, Icahn School of Medicine at Mount Sinai, 1 Gustave L. Levy Place, New York, New York, USA, 10029

<sup>5</sup> Neurology, Stroke Unit, Burke Rehabilitation Hospital, 785 Mamaroneck Avenue, White Plains, New York, USA, 10605

### **Supplemental Tables**

Table I. Patients with Left Brain Lesion: Admission and Discharge Characteristics of Patients with (Pusher) and without Lateropulsion (Non-Pusher) and Results of Paired *t*-Tests

| Characteristic                                                     | N  | Admission   |             |         | Discharge |             |             |         |
|--------------------------------------------------------------------|----|-------------|-------------|---------|-----------|-------------|-------------|---------|
|                                                                    |    | Non-Pusher  | Pusher      | P Value | N         | Non-Pusher  | Pusher      | P Value |
| Age, Mean (SD), y                                                  | 28 | 77.3 (8.0)  | 76.9 (8.8)  | NS      |           |             |             |         |
| Time since Stroke Onset, Mean (SD), d                              | 28 | 9.2 (5.8)   | 9.6 (5.9)   | NS      |           |             |             |         |
| Admission Lower Extremity Motricity Index Involved Side, Mean (SD) | 28 | 49.5 (34.8) | 42.4 (34.2) | NS      |           |             |             |         |
| Admission Upper Extremity Motricity Index Involved Side, Mean (SD) | 28 | 43.2 (39.1) | 33.1 (36.6) | NS      |           |             |             |         |
| Burke Lateropulsion Scale Score, Mean (SD)                         | 25 | 0.2 (0.6)   | 4.3 (3.1)   | <0.001  | 19        | 0.0 (0.0)   | 2.1 (2.1)   | <0.001  |
| Upper Extremity Fugl-Meyer Motor Score, Mean (SD)                  | 9  | 17.7 (23.4) | 21.8 (21.5) | NS      | 5         | 15.6 (17.1) | 26.2 (20.0) | NS      |
| Lower Extremity Fugl-Meyer Motor Score, Mean (SD)                  | 21 | 10.8 (9.5)  | 10.4 (8.3)  | NS      | 15        | 18.1 (10.9) | 17.3 (8.9)  | NS      |

|                                          |    |             |             |    |    |             |             |       |
|------------------------------------------|----|-------------|-------------|----|----|-------------|-------------|-------|
| Cognitive FIM, Mean (SD)                 | 27 | 16.7 (13.5) | 12.6 (5.3)  | NS | 27 | 24.6 (17.7) | 19.1 (8.9)  | NS    |
| Motor FIM, Mean (SD)                     | 28 | 17.8 (5.5)  | 17.3 (5.2)  | NS | 27 | 32.4 (16.7) | 29.9 (14.1) | NS    |
| Total FIM, Mean (SD)                     | 27 | 34.5 (15.5) | 29.8 (9.0)  | NS | 27 | 57.0 (23.8) | 48.9 (19.6) | NS    |
| Fugl-Meyer Balance Score, Mean (SD)      | 21 | 4.5 (2.0)   | 3.5 (2.3)   | NS | 18 | 7.8 (2.3)   | 5.9 (2.4)   | 0.007 |
| Line Crossing Total Score, Mean (SD)     | 13 | 32.1 (8.8)  | 32.4 (9.9)  | NS | 6  | 33.0 (4.8)  | 35.8 (0.4)  | NS    |
| Star Cancellation Total Score, Mean (SD) | 4  | 37.0 (24.5) | 40.3 (26.8) | NS | 7  | 49.3 (4.4)  | 48.3 (8.9)  | NS    |

NS = not significant; Time since Onset of Stroke = count of days from stroke onset as recorded in acute care hospital admission record and the day of admission to inpatient rehabilitation.

Table II. Patients with Right Brain Lesion: Admission and Discharge Characteristics of Patients with (Pusher) and without Lateropulsion (Non-Pusher) and Results of Paired *t*-Tests

| Characteristic                                                     | N  | Admission   |             |         | Discharge |             |             |         |
|--------------------------------------------------------------------|----|-------------|-------------|---------|-----------|-------------|-------------|---------|
|                                                                    |    | Non-Pusher  | Pusher      | P Value | N         | Non-Pusher  | Pusher      | P Value |
| Age, Mean (SD), y                                                  | 22 | 75.8 (12.0) | 76.1 (12.3) | NS      |           |             |             |         |
| Time since Stroke Onset, Mean (SD), d                              | 22 | 7.6 (5.3)   | 8.4 (5.0)   | NS      |           |             |             |         |
| Admission Lower Extremity Motricity Index Involved Side, Mean (SD) | 22 | 55.7 (31.3) | 33.7 (30.0) | 0.014   |           |             |             |         |
| Admission Upper Extremity Motricity Index Involved Side, Mean (SD) | 22 | 45.9 (37.0) | 25.0 (30.2) | 0.036   |           |             |             |         |
| Burke Lateropulsion Scale Score, Mean (SD)                         | 22 | 0.2 (0.5)   | 4.8 (2.9)   | <0.001  | 17        | 0.1 (0.2)   | 3.7 (3.5)   | 0.001   |
| Upper Extremity Fugl-Meyer Motor Score, Mean (SD)                  | 9  | 15.8 (16.3) | 15.2 (13.3) | NS      | 5         | 28.8 (28.9) | 29.8 (23.8) | NS      |
| Lower Extremity Fugl-Meyer Motor Score, Mean (SD)                  | 21 | 14.1 (8.4)  | 7.8 (6.5)   | 0.008   | 15        | 19.0 (9.5)  | 14.3 (9.1)  | NS      |
| Cognitive FIM, Mean (SD)                                           | 22 | 21.5 (4.4)  | 19.1 (5.4)  | NS      | 22        | 29.5 (12.7) | 24.7 (7.8)  | NS      |
| Motor FIM, Mean (SD)                                               | 22 | 21.8 (5.8)  | 19.9 (5.7)  | 0.034   | 22        | 40.8 (18.8) | 32.7 (14.7) | NS      |

|                                          |    |             |             |       |    |             |             |       |
|------------------------------------------|----|-------------|-------------|-------|----|-------------|-------------|-------|
| Total FIM, Mean (SD)                     | 22 | 43.3 (8.0)  | 39.0 (9.6)  | 0.019 | 22 | 70.3 (23.1) | 57.5 (18.1) | 0.017 |
| Fugl-Meyer Balance Score, Mean (SD)      | 21 | 5.6 (2.4)   | 4.0 (1.8)   | 0.043 | 17 | 7.9 (2.5)   | 5.4 (2.5)   | 0.002 |
| Line Crossing Total Score, Mean (SD)     | 17 | 31.4 (8.3)  | 27.9 (12.2) | NS    | 6  | 28.8 (12.1) | 33.3 (4.8)  | NS    |
| Star Cancellation Total Score, Mean (SD) | 8  | 28.5 (19.1) | 42.3 (15.9) | NS    | 8  | 40.9 (15.9) | 42.4 (15.7) | NS    |

NS = not significant; Time since Onset of Stroke = count of days from stroke onset as recorded in acute care hospital admission record and the day of admission to inpatient rehabilitation.
